# Supplementary material
Source: PubMed Central journal article supplement (PMC6416438)
Supplement: supp_RA118.004571_138942_3_supp_259902_pklq90.pdf [file supp_RA118.004571_138942_3_supp_259902_pklq90.pdf]

## Supplementary Information

### **An alternative N-terminal fold of the intestine-specific annexin A13a induces dimerization and regulates membrane-binding**

**Kathryn M. McCulloch<sup>1,%,\dagger</sup>, Izumi Yamakawa<sup>1,\dagger</sup>, David A Shifrin Jr.<sup>2</sup>, Russell E. McConnell<sup>2,&</sup>, Nora J. Foegeding<sup>2</sup>, Prashant K. Singh<sup>1</sup>, Suli Mao<sup>2</sup>, Matthew J. Tyska<sup>2</sup>, and T.M. Iverson<sup>1,3,4,5</sup>**

From the Departments of <sup>1</sup>Pharmacology, <sup>2</sup>Cell and Developmental Biology, and <sup>3</sup>Biochemistry, the <sup>4</sup>Center for Structural Biology, and the <sup>5</sup>Vanderbilt Institute of Chemical Biology, Vanderbilt University, Nashville, Tennessee 37232

Running title: *Annexin A13a dimerization regulates membrane-binding*

<sup>\dagger</sup>These authors contributed equally to this manuscript

<sup>%</sup>Present address: California State Polytechnic University, Pomona, CA 91768, <sup>&</sup>Present address: Codiak Biosciences, Cambridge, MA 02139

\*To whom correspondence should be addressed: T.M. Iverson: Departments of Pharmacology and Biochemistry, Vanderbilt University, Nashville, Tennessee 37232; [tina.iverson@vanderbilt.edu](mailto:tina.iverson@vanderbilt.edu)

SI Figure 1.

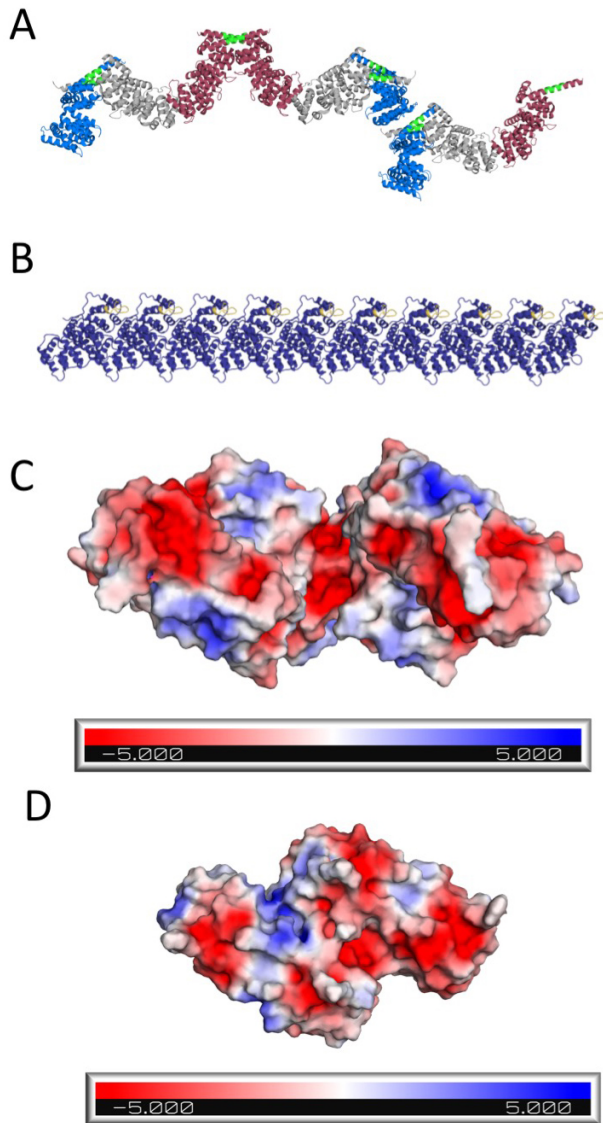

**SI Figure 1. Crystal packing and electrostatic surface potential analysis of Anx A13a and Anx A5 (PDB 1A8A).** A. Crystal packing of Anx A13a shows that the 25-34 region (highlighted in green) assists in dimer formation but does not make additional contacts within the lattice. B. Crystal packing of Anx A5 (PDB entry 1A8A). C. Electrostatic surface potential representation of the Anx A13a dimer. The view is of the putative  $\text{Ca}^{2+}$  binding surface and is  $180^\circ$  rotated from the view in Fig. 2B. Bound  $\text{Ca}^{2+}$  is anticipated to neutralize the negative charge and bind to membrane phospholipids. D. Electrostatic surface potential of the membrane binding surface of the Anx A5 monomer shows a similar charge distribution.

**SI Figure 2.**

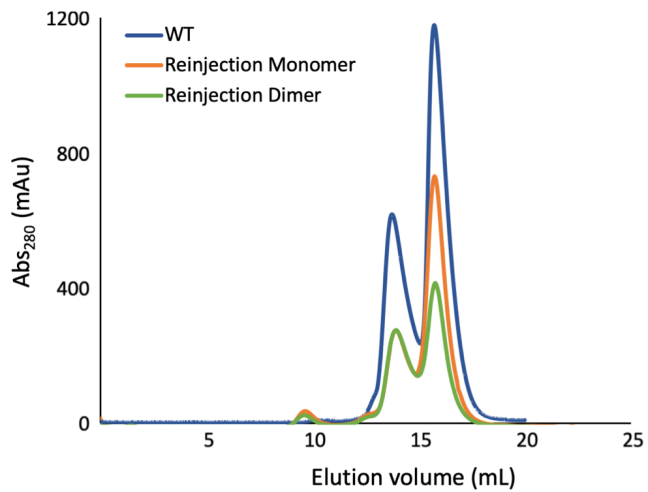

**SI Figure 2. Dynamic monomer-dimer equilibrium of Anx A13a.** Size-exclusion chromatogram of wild-type Anx A13a injected at a concentration of 1 mg/mL (blue trace). Fractions from the dimer peak (elution volume ~13.6 mL) and monomer peak (elution volume ~15.3 mL) were collected and subsequently reinjected onto the same column. Both reinjection traces of the dimer (green) and monomer (orange) show the redistribution into the dimer and monomer peaks.

**SI Figure 3.**

**A**

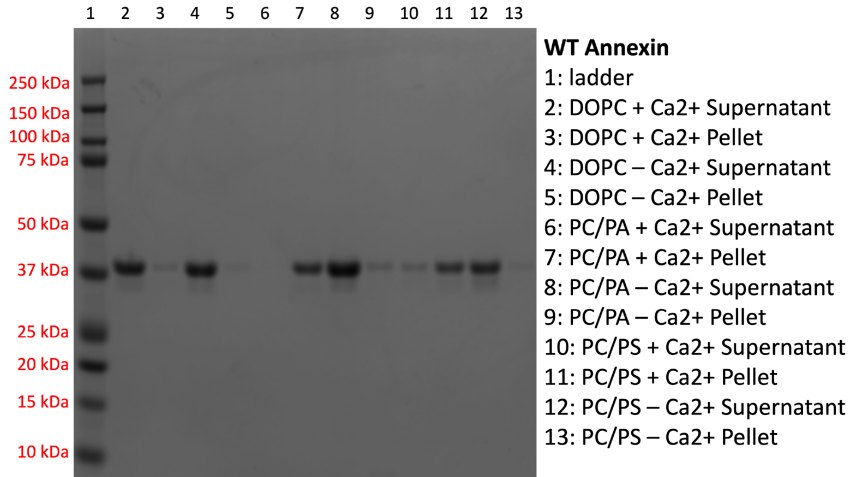

**B**

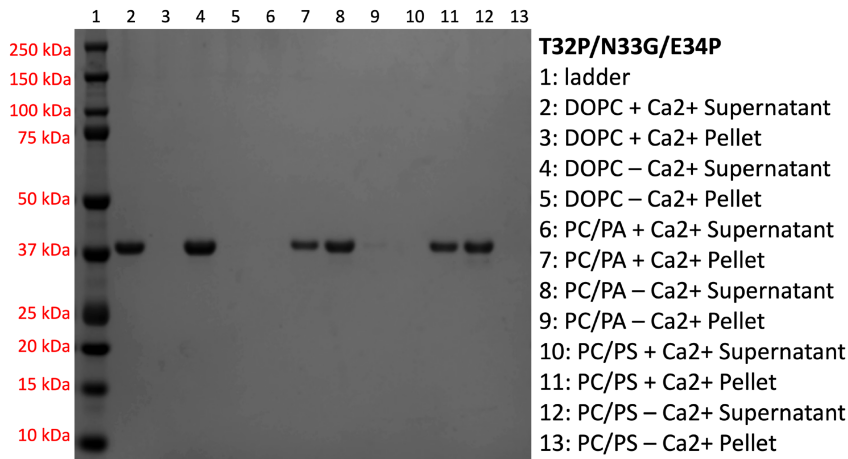

**C**

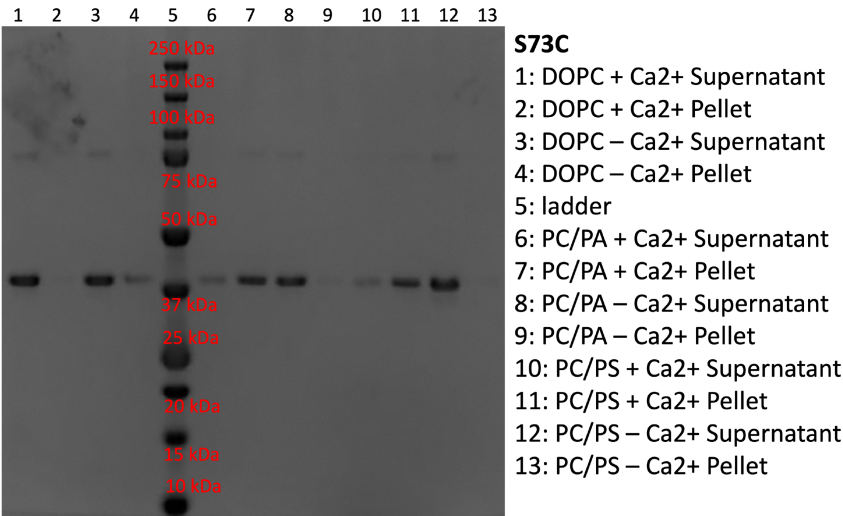

**SI Figure 3. Full SDS-PAGE gels of representative liposome spin assays.** Full SDS-PAGE gels for Anx A13a-liposome spin assays performed in **Figure 6** for A. Wild-type Annexin A13a, B. Constitutive monomer, and C. Enhanced dimer.
